# Supplementary material for: Oropharyngeal Tularemia Outbreak Associated with Drinking Contaminated Tap Water, Turkey, July–September 2013
Source: Emerg Infect Dis. 2015 Dec;21(12):2194–6. doi: 10.3201/eid2112.142032 (PMC4672448; doi:10.3201/eid2112.142032)
Supplement: Technical Appendix — Age distribution and clinical and signs and symptoms of probable and confirmed case-patients and findings of environmental investigations during a tularemia outbreak, Sancaktepe Village, Turkey, July–August 2013. [file 14-2032-Techapp-s1.pdf]

# Oropharyngeal Tularemia Outbreak Associated with Drinking Contaminated Tap Water, Turkey, July–September 2013

## Technical Appendix

**Technical Appendix Table 1.** Age distribution of probable and confirmed case-patients during a tularemia outbreak, Sancaktepe Village, Turkey, July–August 2013

| Age group, y | No. cases /no. persons total (%) |
|--------------|----------------------------------|
| 1–10         | 9/36 (25)                        |
| 11–20        | 7/50 (14)                        |
| 21–40        | 12/73 (16)                       |
| 41–60        | 15/82 (18)                       |
| 61–90        | 12/63 (19)                       |
| All          | 55/304 (18)                      |

**Technical Appendix Table 2.** Clinical signs and symptoms of probable and confirmed case-patients during a tularemia outbreak, Sancaktepe Village, Turkey, July–August 2013

| Signs and symptoms                                   | No. (%) cases, N = 55 |
|------------------------------------------------------|-----------------------|
| Chills                                               | 46 (84)               |
| Sore throat                                          | 45 (82)               |
| Fever                                                | 40 (73)               |
| Headache                                             | 40 (73)               |
| Myalgia                                              | 32 (58)               |
| Swollen lymph nodes in neck or periauricular regions | 32 (58)               |
| Vomiting and/or diarrhea                             | 20 (36)               |
| Swelling or redness of eyes*                         | 14 (26)               |

\*All of these case-patients also had sore throat or swollen lymph nodes in neck or periauricular regions.

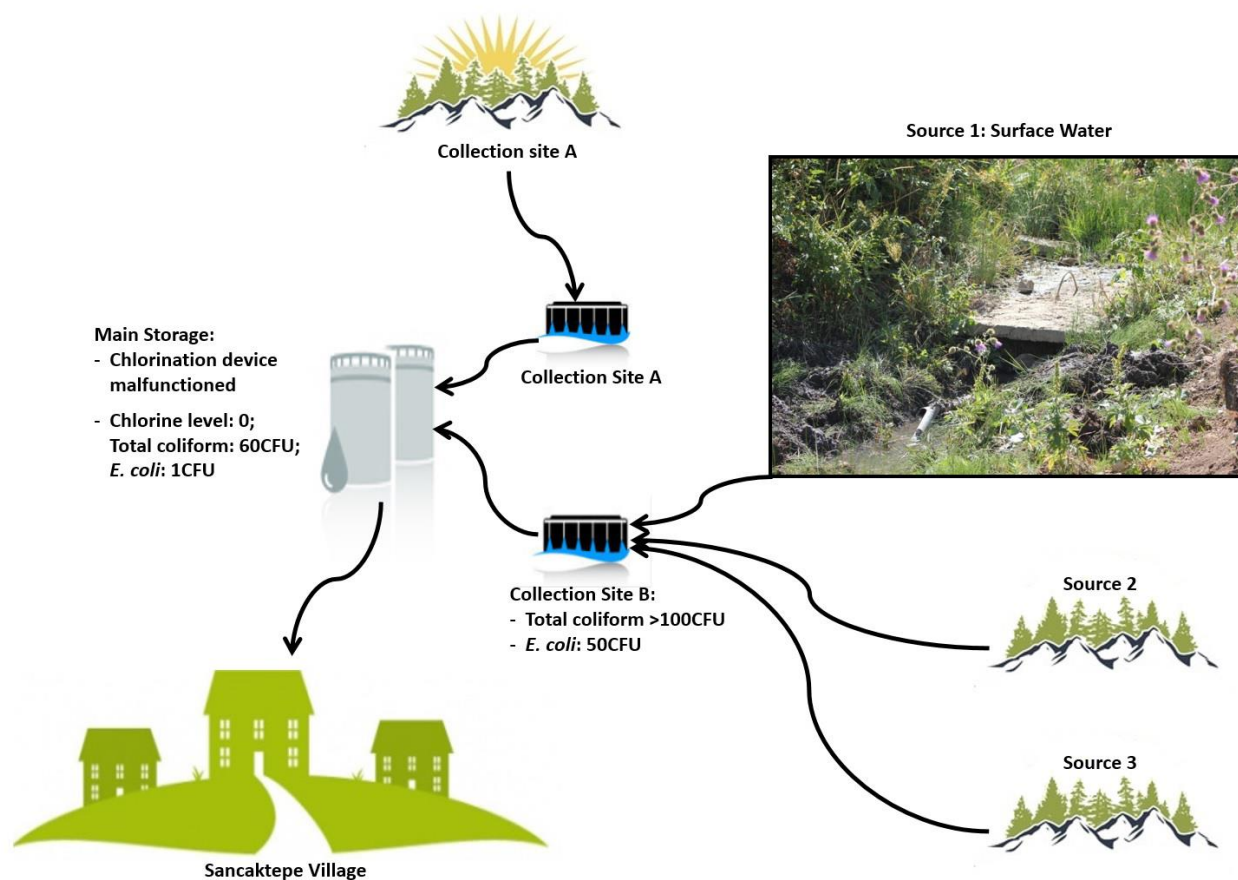

**Technical Appendix Figure.** Tap water system and findings of environmental investigations during a tularemia outbreak, Sancaktepe Village, Turkey, July–August 2013.
